# Supplementary material
Source: bioRxiv or medRxiv preprint supplement (https://medrxiv.org/highwire/filestream/88072/field_highwire_adjunct_files/1/2020.06.30.20143867-2.pdf)
Supplement: Supplementary file [file 2020.06.30.20143867-2.pdf]

## Supplementary Appendix Contents

1. List of personnel for Temple University COVID-19 Research Group

# Temple University COVID-19 Research Group

| <b>Name</b>                    | <b>Department</b>  |
|--------------------------------|--------------------|
| Aaron Mishkin                  | Infectious Disease |
| Abbas Abbas                    | TMS                |
| Abhijit S Pathak               | Surgery            |
| Abhinav Rastogi                | Admin              |
| Adam Diamond                   | Pharmacy           |
| Aditi Satti                    | TMS                |
| Adria Simon                    | Emergency Medicine |
| Ahmed Soliman                  | TMS                |
| Alan Braveman                  | TMS                |
| Albert J Mamary                | TMS                |
| Aloknath Pandya                | TMS                |
| Amy Goldberg                   | Surgery            |
| Amy Kambo                      | TMS                |
| Andrew Gangemi                 | TMS                |
| Anjali Vaidya                  | Cardiology         |
| Ann Davison                    | TMS                |
| Anuj Basil                     | Cardiology         |
| Bakhos, Charles T              | TMS                |
| Bill Cornwell                  | TMS                |
| Brianna Sanguily               | TMS                |
| Brittany Corso                 | Internal Medicine  |
| Carla Grabianowski             | TMS                |
| Carly Sedlock                  | Infectious Disease |
| Catherine Myers                | TMS                |
| Catherine Myers                | TMS                |
| Charles Bakhos                 | TMS                |
| Chenna Kesava Reddy Mandapati, | TMS                |
| Cherie Erkmen                  | TMS                |
| Chethan Gangireddy             | Cardiology         |
| Chih-ru Lin                    | TMS                |
| Christopher T Burks            | Lab Administration |
| Claire Raab                    | Internal Medicine  |
| Crabbe, Deborah                | Cardiology         |
| Crystal Chen                   | Internal Medicine  |
| Daniel Edmundowicz             | Cardiology         |
| Daniel Sacher                  | TMS                |
| Daniel Salerno                 | TMS                |
| Daniele Simon                  | Emergency Medicine |
| David Ambrose                  | TMS                |
| David Ciccolella               | TMS                |
| Debra Gillman                  | TMS                |
| Dolores Fehrle                 | TMS                |
| Dominic Morano                 | TMS                |
| Donnalynn Bassler              | TMS                |
| Edmund Cronin                  | Cardiology         |

# Temple University COVID-19 Research Group

|                    |                    |
|--------------------|--------------------|
| Eduardo Dominguez  | TMS                |
| Ekam Randhawa      | TMS                |
| Ekamjeet Randhawa  | TMS                |
| Eman Hamad         | Cardiology         |
| Eneida Male        | TMS                |
| Erin Narewski      | TMS                |
| Francis Cordova    | TMS                |
| Frederic Jaffe     | TMS                |
| Frederich Kueppers | TMS                |
| Fusun Dikengil     | TMS                |
| Galli, Jonathan    | TMS                |
| Gangemi, Andrew    | TMS                |
| Garfield, Jamie    | TMS                |
| Gayle Jones        | TMS                |
| Gennaro Calendo    | TMS                |
| Gerard Criner      | TMS                |
| Gilbert D'Alonzo   | TMS                |
| Ginny Marmolejos   | TMS                |
| Gordon, Matthew    | TMS                |
| Gregory Millio     | Internal Medicine  |
| Gupta, Rohit       | TMS                |
| Gustavo Fernandez  | TMS                |
| Hannah Simborio    | TMS                |
| Harwood Scott      | TMS                |
| Heidi Shore-Brown  | TMS                |
| Hernan Alvarado    | Respiratory Care   |
| Ho-Man Yeung       | Internal Medicine  |
| Ibraheem Yousef    | TMS                |
| Ifeoma Oriaku      | TMS                |
| Iris Jung-won Lee  | Nephrology         |
| Isaac Whitman      | Cardiology         |
| James Brown        | TMS                |
| Jamie L. Garfield  | TMS                |
| Janpreet Mokha     | TMS                |
| Jason Gallagher    | School of Pharmacy |
| Jeffrey Stewart    | TMS                |
| Jenna Murray       | TMS                |
| Jessica Tang       | TMS                |
| Jeyssa Gonzalez    | TMS                |
| Jichuan Wu         | TMS                |
| Jiji Thomas        | TMS                |
| Jim Murrett        | Ultrasound Fellow  |
| Joanna Beros       | TMS                |
| John M. Travaline  | TMS                |
| Jolly Varghese     | TMS                |
| Jordan Senchak     | Internal Medicine  |
| Joseph Lambert     | TMS                |

# Temple University COVID-19 Research Group

|                          |                    |
|--------------------------|--------------------|
| Joseph Ramzy             | TMS                |
| Joshua Cooper            | Cardiology         |
| Jun Song                 | Medical Student    |
| Junad Chowdhury          | TMS                |
| Kaitlin Kennedy          | TMS                |
| Karim B Ahmed            | TMS                |
| Karim Loukmane           | TMS                |
| Karthik Shenoy           | TMS                |
| Kathleen Brennan         | TMS                |
| Keith Johnson            | TMS                |
| Kevin Carney             | TMS                |
| Kraftin Schreyer         | Emergency Medicine |
| Kristin Criner           | Endo               |
| Kumaran, Maruti          | Radiology          |
| Lauren Miller            | TMS                |
| Laurie Jameson           | TMS                |
| Laurie Johnson           | TMS                |
| Laurie Kilpatrick        | TMS                |
| Lii-Yoong Criner         | TMS                |
| Lily Zhang               | TMS                |
| Lindsay K Mcgann         | Hospitalist        |
| Llera A Samuels          | TMS                |
| Marc Diamond             | TMS                |
| Margaret Kerper          | TMS                |
| Maria Vega Sanchez       | TMS                |
| Mariola Marcinkienwicz   | TMS                |
| Maritza Pedlar           | TMS                |
| Mark Aksoy               | TMS                |
| Mark Weir                | TMS                |
| Marla R. Wolfson         | TMS                |
| Marla Wolfson            | TMS                |
| Marron, Robert           | TMS                |
| Martin Keane             | Cardiology         |
| Massa Zantah             | TMS                |
| Mathew Zheng             | TMS                |
| Matthew Delfiner         | Internal Medicine  |
| Matthew Gordon           | TMS                |
| Maulin Patel             | TMS                |
| Megan Healy              | Emergency Medicine |
| Melinda Darnell          | TMS                |
| Melinda Darnell          | TMS                |
| Melissa Navaro           | TMS                |
| Meredith A. Brisco-Bacik | Cardiology         |
| Michael Bromberg         | Hematology         |
| Michael Gannon           | Cardiology         |
| Michael Jacobs           | TMS                |
| Mira Mandal              | TMS                |

# Temple University COVID-19 Research Group

|                      |                       |
|----------------------|-----------------------|
| Nanzhou Gou          | TMS                   |
| Narewski, Erin       | TMS                   |
| Nathaniel Marchetti  | TMS                   |
| Nathaniel Xander     |                       |
| TMS                  |                       |
| Navjot Kaur          | TMS                   |
| Neil Nadpara         | Internal Medicine     |
| Nicole Desai         | Internal Medicine     |
| Nicole Mills         | TMS                   |
| Norihisa Shigemura   | Surgery               |
| Ohoud Rehbini        | TMS                   |
| Oisin O'Corragain    | TMS                   |
| Oisin O'Corragain    | TMS                   |
| Omar Sheriff         | TMS                   |
| Oneida Arosarena     | Otolaryngology        |
| Osheen Abramian      | TMS                   |
| Paige Stanley        | TMS                   |
| Parag Desai          | TMS                   |
| Parth Rali           | TMS                   |
| Patrick Mulhall      | Pulm                  |
| Pravin Patil         | Cardiology            |
| Priju Varghese       | Internal Medicine     |
| Puja Dubal           | TMS                   |
| Puja Patel           | TMS                   |
| Rachael Blair        | TMS                   |
| Rajagopalan Rengan   | TMS                   |
| Rami Alashram        | TMS                   |
| Randol Hooper        | TMS                   |
| Rebecca A Armbruster | Chief Medical Officer |
| Regina Sheriden      | TMS                   |
| Robert Marron        | TMS                   |
| Roberto Caricchio    | Rheumatology          |
| Rogers Thomas        | TMS                   |
| Rohit Gupta          | TMS                   |
| Rohit Soans          | Surgery               |
| Roman Petrov         | TMS                   |
| Roman Prośniak       | TMS                   |
| Romulo Fajardo       | Surgery               |
| Ruchi Bhutani        | TMS                   |
| Ryan Townsend        | TMS                   |
| Sabrina Islam        | Cardiology            |
| Samantha Pettigrew   | Internal Medicine     |
| Samantha Wallace     | TMS                   |
| Sameep Sehgal        | TMS                   |
| Samuel Krachman      | TMS                   |
| Santosh Dhungana     | TMS                   |
| Sarah Hoang          | TMS                   |

# Temple University COVID-19 Research Group

|                             |                       |
|-----------------------------|-----------------------|
| Sean Duffy                  | TMS                   |
| Seema Rani                  | TMS                   |
| Shapiro William             | TMS                   |
| Sheila Weaver               | TMS                   |
| Shelu Benny                 | TMS                   |
| Sheril George               | TMS                   |
| Shuang Sun                  | TMS                   |
| Shubhra Srivastava-Malhotra | TMS                   |
| Stephanie Bricton           | TMS                   |
| Stephanie Spivack           | Infectious Disease    |
| Stephanie Tittaferante      | Internal Medicine     |
| Stephanie Yerkes            | TMS                   |
| Stephen Priest              | Internal Medicine     |
| Steve Codella               | TMS                   |
| Steven G Kelsen             | TMS                   |
| Steven Houser               | Research              |
| Steven Verga                | TMS                   |
| Sudhir Bolla                | TMS                   |
| Sudhir Kotnala              | TMS                   |
| Sunil Karhadkar             | Surgery               |
| Sylvia Johnson              | TMS                   |
| Tahseen Shariff             | TMS                   |
| Tammy Jacobs                | TMS                   |
| Thomas Hooper               | TMS                   |
| Tom Rogers                  | TMS                   |
| Tony S. Reed                | Chief Medical Officer |
| Tse-Shuen Ku                | TMS                   |
| Uma Sajjan                  | TMS                   |
| Victor Kim                  | TMS                   |
| Whitney Cabey               | Emergency Medicine    |
| Wissam Chatila              | TMS                   |
| Wuyan Li                    | TMS                   |
| Zach Dorey-Stein            | TMS                   |
| Zachariah Dorey-Stein       | TMS                   |
| Zachary D Repanshek         | Emergency Medicine    |

\*TMS – Thoracic Medicine and Surgery
